# Supplementary material for: Metabolomic Profiles of Essential Oils from Selected Rosa Varieties and Their Antimicrobial Activities
Source: MDPI journal article supplement (doi:10.3390/plants10081721), 2021-08-20
Supplement: s1 [file s1]

---

## Supplementary material

Article

# Metabolomic Profiles of Essential Oils from Selected *Rosa* Varieties and their Antimicrobial Activities

Esraa A. Elhawary<sup>#</sup>, Nada M. Mostafa<sup>\*,\*</sup>, Rola M. Labib, and Abdel Nasser Singab<sup>\*</sup>

Department of Pharmacognosy, Faculty of Pharmacy, Ain-Shams University, Cairo 11566, Egypt; esraa.elhawary@pharma.asu.edu.eg (E.A.E.); nadamostafa@pharma.asu.edu.eg (N.M.M.); rolamilad@pharma.asu.edu.eg (R.M.L.); dean@pharma.asu.edu.eg (A.N.S.)

<sup>#</sup> These authors contributed equally to this work

<sup>\*</sup> Correspondence: A.N.S., dean@pharma.asu.edu.eg; Tel.: +20224051120; N.M.M., nadamostafa@pharma.asu.edu.eg; Tel.: +201025666872

**Abstract:** This study aimed to analyze the essential oils of aerial parts (A) and flowers (F) of *Rosa banksiae* var. *banksiae* Ait. (RBW), *Rosa polyantha* Thunb. 'white fairy' (RPW) and *Rosa polyantha* Thunb. 'orange fairy', family Rosaceae, together with multivariate data analyses and antimicrobial activity evaluation. The essential oils analyses were performed by GC/FID and GC/MS. Principal Component Analysis (PCA), Hierarchical Cluster Analysis (HCA) and clustered heatmap were used for the multivariate analyses. The antimicrobial activity was evaluated by well-diffusion method against four bacteria and four fungi. Two hundred fifty-three compounds were identified from the six oil samples. The major components in RBW-A, RPO-A, and RPW-A were *n*-undecane (14.40, 19.36, and 9.21 %) *n*-dodecane (14.54, 22.13, and 8.39 %), and yomogi alcohol (8.41, 10.53, and 6.28 %), respectively. While in RBW-F, RPO-F and RPW-F were *n*-heptadecane (16.70 %), *n*-undecane (7.98 %), and  $\beta$ -phellandrene (22.78 %), respectively. The tested essential oils showed moderate antifungal activity against *Aspergillus fumigatus* compared to amphotericin B. PCA, HCA revealed five main clusters and the clustered heatmap showed the highest concentrations in red and the lowest ones in blue. The six samples carry close chemical profiles and can be regarded as fruitful sources of safe antifungal agents.

**Keywords:** *Rosa* species; Aspergillosis; essential oil; chemometrics; clustered heatmap

**Table S1.** Volatile constituents identified in the aerial parts and flower the volatile oils of different *Rosa* varieties.

| Sr.<br>No. | Component                                           | KI    |      | Peak area % |      |      |      |      |      | Sr.<br>No. | Component                               | KI    |      | Peak area % |      |      |      |      |             |
|------------|-----------------------------------------------------|-------|------|-------------|------|------|------|------|------|------------|-----------------------------------------|-------|------|-------------|------|------|------|------|-------------|
|            |                                                     | Obsd. | Lit. | RBW         | RPO  | RPW  | RBW  | RPO  | RPW  |            |                                         | Obsd. | Lit. | RBW         | RPO  | RPW  | RBW  | RPO  | RPW         |
|            |                                                     |       |      | A           | A    | A    | F    | F    | F    |            |                                         |       |      | A           | A    | A    | F    | F    | F           |
| 1.         | <i>n</i> -Octane <sup>*h</sup>                      | 800   | 800  | 0.29        | -    | 0.33 | 0.08 | 0.19 | 0.08 | 13.        | <i>Artemisia triene</i> <sup>b</sup>    | 925   | 924  | 0.52        | -    | 0.51 | 0.23 | 0.35 | <b>6.21</b> |
| 2.         | Ethyl butanoate <sup>a</sup>                        | 804   | 804  | 0.19        | -    | 0.14 | 0.13 | 0.09 | 0.03 | 14.        | Ethyl tiglate <sup>a</sup>              | 931   | 944  | 0.52        | -    | 0.60 | 0.21 | 0.38 | 0.13        |
| 3.         | Isopropyl butanoate <sup>a</sup>                    | 847   | 848  | 0.27        | -    | 0.20 | 0.18 | 0.13 | 0.05 | 15.        | Tetrahydro-Citronellene <sup>b</sup>    | 937   | 937  | -           | -    | 0.05 | -    | -    | -           |
| 4.         | (2 <i>E</i> )-Hexenal <sup>h</sup>                  | 855   | 853  | -           | -    | 0.27 | -    | 0.17 | 0.04 | 16.        | $\beta$ -Citronellene <sup>b</sup>      | 940   | 947  | -           | -    | 0.24 | -    | 0.06 | -           |
| 5.         | ( <i>E</i> )-Salvene <sup>h</sup>                   | 866   | 867  | -           | -    | 0.17 | -    | 0.11 | 0.03 | 17.        | $\alpha$ -Fenchene <sup>b</sup>         | 945   | 953  | -           | -    | 0.09 | -    | 0.04 | -           |
| 6.         | Santene <sup>h</sup>                                | 879   | 884  | 0.25        | 0.38 | 0.25 | 0.09 | 0.15 | 0.04 | 18.        | 3-Hepten-1-ol <sup>h</sup>              | 949   | 954  | 0.38        | -    | 0.66 | 0.18 | 0.42 | 0.14        |
| 7.         | <i>n</i> -Nonane <sup>h</sup>                       | 890   | 900  | 0.51        | -    | 1.39 | 0.57 | 0.86 | 0.27 | 19.        | Camphene <sup>*b</sup>                  | 954   | 955  | -           | -    | 1.17 | -    | 0.76 | -           |
| 8.         | (4 <i>Z</i> )-Heptenal <sup>h</sup>                 | 895   | 904  | -           | 1.88 | 0.11 | -    | 0.08 | -    | 20.        | ( <i>E</i> )-2-Hepten-1-ol <sup>h</sup> | 956   | 965  | 0.48        | -    | 0.43 | -    | 0.28 | 0.12        |
| 9.         | Santolina triene <sup>b</sup>                       | 908   | 908  | -           | -    | 0.08 | -    | 0.02 | 0.43 | 21.        | Ethyl-3-methyl Pentanoate <sup>a</sup>  | 959   | 960  | 0.80        | 0.60 | 0.70 | 0.28 | 0.46 | 0.19        |
| 10.        | Isocitronellene <sup>b</sup>                        | 913   | 926  | -           | -    | 0.18 | -    | 0.09 | 0.04 | 22.        | ( <i>E</i> )-Pinane <sup>b</sup>        | 962   | 972  | -           | -    | 0.14 | -    | 0.10 | -           |
| 11.        | 2,5-Diethenyl-2-methyl-Tetrahydrofuran <sup>h</sup> | 916   | 914  | -           | -    | 0.35 | -    | 0.20 | 0.07 | 23.        | ( <i>Z</i> )-4-Hepten-1-ol <sup>h</sup> | 966   | 870  | 0.44        | -    | 0.60 | 0.17 | 0.42 | 0.17        |
| 12.        | Ethyl-2-methyl-4-Pentenoate <sup>a</sup>            | 921   | 926  | 0.59        | 0.56 | 0.76 | 0.22 | 0.46 | 0.12 | 24.        | Artemiseole <sup>c</sup>                | 968   | 976  | 0.24        | -    | 0.48 | 0.08 | 0.32 | 0.10        |
| 25.        | 1-Octen-3-one <sup>h</sup>                          | 971   | 980  | -           | -    | 0.61 | -    | 0.39 | 0.27 | 39.        | $\alpha$ -Phellandrene <sup>*b</sup>    | 1005  | 1005 | -           | -    | -    | -    | -    | <b>6.61</b> |

|     |                                                    |      |      |             |              |             |      |             |      |     |                                                    |      |      |      |      |      |      |      |              |
|-----|----------------------------------------------------|------|------|-------------|--------------|-------------|------|-------------|------|-----|----------------------------------------------------|------|------|------|------|------|------|------|--------------|
| 26. | (Z)-Sabinene <sup>b</sup>                          | 974  | 975  | -           | -            | 0.06        | -    | -           | 1.96 | 40. | Dehydroxy- <i>cis</i> -Linalool oxide <sup>c</sup> | 1008 | 1008 | -    | -    | 0.21 | -    | 0.24 | 0.04         |
| 27. | exo-2-Neoborneol <sup>h</sup>                      | 975  | 976  | -           | -            | 0.12        | -    | 0.09        | -    | 41. | $\delta$ -3-Carene <sup>b</sup>                    | 1011 | 1011 | -    | -    | 0.15 | -    | 0.11 | -            |
| 28. | <i>trans-p</i> -Menthane <sup>b</sup>              | 979  | 979  | 0.92        | 1.53         | 1.12        | 0.36 | 0.75        | 0.25 | 42. | 1,4-Cineole <sup>c</sup>                           | 1014 | 1016 | -    | -    | 0.24 | -    | 0.16 | -            |
| 29. | 3- <i>p</i> -Menthene <sup>b</sup>                 | 983  | 988  | 0.74        | -            | 0.88        | 0.26 | 0.59        | 0.16 | 43. | $\alpha$ -Terpinene <sup>b</sup>                   | 1017 | 1018 | -    | -    | -    | -    | -    | 1.16         |
| 30. | 6-Methyl-5-Hepten-2-one <sup>h</sup>               | 985  | 986  | -           | -            | 0.25        | -    | 0.17        | -    | 44. | 3-Methyl-Cyclopentane-1,2-dione <sup>h</sup>       | 1021 | 1043 | 1.5  | 1.18 | 1.33 | 0.46 | 0.96 | -            |
| 31. | 1-Decene <sup>h</sup>                              | 988  | 993  | -           | -            | 0.16        | -    | 0.11        | -    | 45. | Allyl tiglate <sup>a</sup>                         | 1023 | 1022 | -    | -    | 0.37 | -    | 0.25 | -            |
| 32. | <i>cis-meta</i> -Mentha-2,8-diene <sup>b</sup>     | 990  | 993  | -           | -            | -           | -    | -           | 0.88 | 46. | <i>p</i> -Cymene <sup>*b</sup>                     | 1024 | 1025 | 0.26 | -    | -    | -    | -    | 0.37         |
| 33. | 1,8-Dehydro-Cineole <sup>c</sup>                   | 991  | 994  | -           | 1.54         | 0.06        | -    | 0.04        | -    | 47. | Limonene <sup>*b</sup>                             | 1029 | 1028 | -    | -    | -    | 0.15 | -    | -            |
| 34. | Dehydro- <i>trans</i> -Linalool oxide <sup>c</sup> | 993  | 993  | -           | -            | 0.26        | -    | 0.19        | 0.04 | 48. | 1- <i>p</i> -Menthene <sup>b</sup>                 | 1030 | 1032 | -    | 1.11 | -    | -    | -    | -            |
| 35. | Butyl butanoate <sup>a</sup>                       | 994  | 1002 | 0.67        | -            | 0.37        | 0.23 | 0.27        | 0.07 | 49. | 1,8-Cineole (Eucalyptol)* <sup>c</sup>             | 1031 | 1033 | 1.83 | -    | 1.85 | 0.45 | 1.32 | -            |
| 36. | <b>Yomogi alcohol<sup>c</sup></b>                  | 999  | 999  | <b>8.41</b> | <b>10.53</b> | <b>6.28</b> | 2.24 | <b>4.53</b> | -    | 50. | <b><math>\beta</math>-Phellandrene<sup>b</sup></b> | 1032 | 1033 | -    | -    | -    | -    | -    | <b>22.78</b> |
| 37. | <i>n</i> -Decane <sup>*h</sup>                     | 1000 | 1000 | -           | -            | -           | -    | -           | 1.82 | 51. | ( <i>E</i> )3-Octen-2-one <sup>h</sup>             | 1033 | 1034 | 0.46 | 0.48 | 0.57 | 0.15 | 0.41 | -            |
| 38. | <i>p</i> -Mentha-7,8-diene <sup>b</sup>            | 1004 | 1004 | -           | -            | 0.26        | -    | 0.23        | -    | 52. | ( <i>Z</i> )- $\beta$ -Ocimene <sup>*b</sup>       | 1036 | 1040 | 0.29 | -    | 0.56 | -    | 0.38 | 0.11         |
|     |                                                    |      |      |             |              |             |      |             |      | 53. | Lavenderlactone <sup>g</sup>                       | 1039 | 1041 | 0.21 | -    | 0.29 | -    | 0.22 | 0.05         |
| 54. | Propyl Tiglate <sup>a</sup>                        | 1038 | 1038 | -           | -            | 0.45        | -    | 0.33        | 0.13 | 67. | <i>trans</i> -Linalool oxide <sup>*c</sup>         | 1077 | 1073 | -    | -    | 0.25 | -    | 0.19 | -            |
| 55. | <i>cis</i> -Dihydro-Rose oxide <sup>c</sup>        | 1043 | 1043 | -           | -            | -           | -    | -           | 0.03 | 68. | Artemisia alcohol <sup>c</sup>                     | 1083 | 1092 | 0.90 | 2.13 | 0.95 | 0.31 | 0.74 | 0.18         |
| 56. | <i>cis</i> -Arbusculone <sup>g</sup>               | 1045 | 1051 | -           | -            | 0.18        | -    | 0.14        | 0.12 | 69. | 2-Nonanol <sup>h</sup>                             | 1089 | 1097 | 0.51 | 0.44 | 0.64 | 0.17 | 0.51 | -            |
| 57. | Dihydro-Tagetone <sup>c</sup>                      | 1047 | 1047 | -           | -            | 0.30        | -    | 0.23        | -    | 70. | <i>p</i> -Mentha-2,4(8)-diene <sup>b</sup>         | 1090 | 1088 | -    | -    | -    | -    | -    | 0.82         |
| 58. | ( <i>E</i> )- $\beta$ -Ocimene <sup>*b</sup>       | 1049 | 1049 | -           | -            | -           | -    | -           | 0.40 | 71. | Linalool <sup>*c</sup>                             | 1093 | 1098 | -    | -    | 0.19 | -    | 0.14 | 0.02         |

|     |                                                |      |      |      |      |      |      |      |      |     |                                                     |      |      |             |              |             |             |             |      |
|-----|------------------------------------------------|------|------|------|------|------|------|------|------|-----|-----------------------------------------------------|------|------|-------------|--------------|-------------|-------------|-------------|------|
| 59. | (Z)-3-Octen-1-ol <sup>h</sup>                  | 1051 | 1051 | -    | -    | 0.52 | -    | 0.38 | 0.08 | 72. | (Z)-3-Heptenyl acetate <sup>a</sup>                 | 1095 | 1098 | 0.73        | -            | 0.71        | <b>4.92</b> | 0.61        | 0.13 |
| 60. | cis-Linalool oxide <sup>*c</sup>               | 1066 | 1058 | -    | 0.83 | 0.22 | -    | 0.19 | -    | 73. | <i>n</i> -Undecane <sup>*h</sup>                    | 1100 | 1100 | <b>14.4</b> | <b>19.36</b> | <b>9.21</b> | 0.94        | <b>7.98</b> | 2.88 |
| 61. | (E)-Decahydro-Napht halene <sup>h</sup>        | 1054 | 1054 | 2.24 | 2.14 | 1.95 | 0.81 | 1.38 | 0.43 | 74. | $\alpha$ -Pinene oxide <sup>c</sup>                 | 1101 | 1103 | 0.47        | -            | -           | 0.69        | -           | -    |
| 62. | (E)-2-Octen-1-al <sup>h</sup>                  | 1056 | 1062 | 0.78 | 0.52 | 0.73 | 0.26 | 0.54 | -    | 75. | Maltol <sup>h</sup>                                 | 1105 | 1108 | -           | -            | 0.25        | 0.53        | 0.24        | -    |
| 63. | $\gamma$ -Terpinene <sup>*b</sup>              | 1060 | 1064 | -    | -    | 0.62 | 0.22 | 0.49 | 1.93 | 76. | trans-Vertocitral C <sup>c</sup>                    | 1106 | 1106 | -           | -            | -           | -           | -           | 0.41 |
| 64. | cis-Sabinene hydrate <sup>c</sup>              | 1063 | 1068 | 2.76 | 2.7  | 2.29 | 0.69 | 1.67 | 0.42 | 77. | $\beta$ -Thujone <sup>c</sup>                       | 1110 | 1114 | 0.90        | 0.63         | 0.94        | 0.29        | 0.73        | 0.22 |
| 65. | trans-Arbusculone <sup>g</sup>                 | 1070 | 1070 | 1.15 | -    | 1.57 | 0.36 | 0.84 | 0.23 | 78. | endo-Fenchol <sup>c</sup>                           | 1117 | 1117 | 0.71        | -            | 0.79        | -           | 0.70        | 0.30 |
| 66. | trans-Dihydro-Rose oxide <sup>c</sup>          | 1073 | 1073 | -    | -    | 0.27 | -    | 0.22 | 0.03 | 79. | trans- <i>p</i> -Mentha-2, 8-dien-1-ol <sup>c</sup> | 1126 | 1128 | -           | 1.00         | -           | -           | -           | -    |
| 80. | Dehydro-Sabinaketone <sup>c</sup>              | 1120 | 1125 | -    | -    | 0.23 | -    | 0.19 | 0.03 | 91. | Isobutyl hexanoate <sup>h</sup>                     | 1154 | 1149 | 0.36        | -            | 0.72        | -           | 0.64        | 0.09 |
| 81. | trans-Pinene hydrate <sup>c</sup>              | 1123 | 1123 | -    | -    | 0.39 | -    | 0.33 | -    | 92. | trans- $\beta$ -Terpineol <sup>c</sup>              | 1162 | 1163 | -           | 1.88         | -           | -           | -           | -    |
| 82. | exo-Fenchol <sup>c</sup>                       | 1124 | 1122 | -    | -    | -    | -    | -    | 0.53 | 93. | Dihydro-Myrcenol acetate <sup>c</sup>               | 1212 | 1214 | -           | 1.88         | -           | -           | -           | -    |
| 83. | endo-2-Norborneol acetate <sup>c</sup>         | 1127 | 1128 | 1.12 | -    | 1.84 | 0.39 | 0.97 | 0.24 | 94. | Khusilal <sup>g</sup>                               | 1648 | 1648 | -           | 0.94         | -           | -           | -           | 0.09 |
| 84. | exo-2-Norborneol acetate <sup>c</sup>          | 1129 | 1129 | -    | -    | -    | -    | 0.12 | -    | 95. | cis-Dihydro- $\beta$ -Terpineol <sup>c</sup>        | 1159 | 1160 | 0.75        | 0.61         | 0.77        | 0.23        | 0.68        | 0.13 |
| 85. | 1-Terpineol <sup>c</sup>                       | 1134 | 1134 | 1.32 | 0.92 | 1.78 | 0.33 | 1.34 | 0.24 | 96. | iso-Menthone <sup>c</sup>                           | 1163 | 1164 | 2.43        | -            | 1.96        | 0.62        | 1.62        | 0.34 |
| 86. | trans-Dihydro- $\beta$ -Terpineol <sup>c</sup> | 1138 | 1138 | -    | -    | 0.45 | -    | 0.39 | -    | 97. | neo-Menthol <sup>c</sup>                            | 1165 | 1176 | -           | -            | 0.41        | -           | 0.35        | -    |

|      |                                                          |      |      |              |              |             |             |             |      |      |                                                       |      |      |      |      |      |      |      |      |
|------|----------------------------------------------------------|------|------|--------------|--------------|-------------|-------------|-------------|------|------|-------------------------------------------------------|------|------|------|------|------|------|------|------|
| 87.  | <i>cis</i> -Verbenol <sup>c</sup>                        | 1141 | 1141 | -            | -            | 0.18        | -           | 0.15        | -    | 98.  | Pinocampheol <sup>c</sup>                             | 1169 | 1173 | 0.94 | 1.9  | 0.77 | 0.34 | 0.68 | -    |
| 88.  | <i>cis</i> -Pinene hydrate <sup>c</sup>                  | 1143 | 1143 | -            | -            | 0.23        | -           | 0.21        | 0.46 | 99.  | Rose furan<br>epoxide <sup>g</sup>                    | 1172 | 1172 | -    | -    | 0.15 | -    | 0.17 | -    |
| 89.  | Camphene hydrate <sup>c</sup>                            | 1149 | 1150 | -            | -            | 0.58        | -           | 0.48        | -    | 100. | <i>cis</i> -Linalool oxide<br>(pyranoid) <sup>c</sup> | 1174 | 1174 | -    | -    | 0.12 | -    | -    | 0.04 |
| 90.  | Isopulegol <sup>*c</sup>                                 | 1152 | 1156 | -            | -            | -           | -           | -           | 0.06 | 101. | <i>cis</i> -Pinocamphen<br>e <sup>b</sup>             | 1175 | 1175 | -    | -    | -    | -    | 0.12 | -    |
| 102. | <i>trans</i> - Linalool oxide<br>(pyranoid) <sup>c</sup> | 1176 | 1179 | -            | -            | 0.20        | -           | 0.17        | -    | 116. | <i>cis</i> -Sabinene<br>hydrate acetate <sup>c</sup>  | 1221 | 1221 | -    | -    | 0.14 | -    | 0.11 | -    |
| 103. | Santalone <sup>h</sup>                                   | 1180 | 1181 | -            | -            | -           | -           | -           | 1.62 | 117. | $\beta$ -Citronellol <sup>*c</sup>                    | 1222 | 1228 | -    | -    | 0.13 | -    | 0.15 | -    |
| 104. | 2-Methyl- <i>iso</i> -Borneol <sup>c</sup>               | 1181 | 1183 | -            | -            | 0.46        | -           | 0.42        | -    | 118. | endo-Fenchyl<br>acetate <sup>*c</sup>                 | 1226 | 1225 | -    | -    | 0.03 | -    | -    | -    |
| 105. | Cryptone <sup>c</sup>                                    | 1185 | 1186 | 0.38         | -            | 0.73        | -           | 0.66        | 0.17 | 119. | <i>cis</i> -Carveol <sup>c</sup>                      | 1231 | 1231 | -    | -    | -    | -    | -    | 0.08 |
| 106. | <i>Neo-iso</i> -Verbanol <sup>c</sup>                    | 1189 | 1189 | 0.47         | -            | 0.46        | 0.48        | 0.42        | 0.35 | 120. | exo-Fenchyl<br>acetate <sup>*c</sup>                  | 1234 | 1232 | -    | -    | -    | -    | -    | 0.02 |
| 107. | <i>cis</i> -Dihydro-Carvone <sup>c</sup>                 | 1192 | 1194 | -            | -            | 0.09        | -           | 0.11        | -    | 121. | Carvone <sup>c</sup>                                  | 1239 | 1242 | 0.42 | 0.59 | 0.31 | 0.12 | 0.25 | 0.10 |
| 108. | $\alpha$ -Terpineol <sup>*c</sup>                        | 1193 | 1195 | -            | -            | -           | -           | -           | 0.53 | 122. | <i>O</i> -Anisaldehyde <sup>f</sup>                   | 1242 | 1242 | -    | -    | 0.11 | -    | 0.05 | -    |
| 109. | <i>cis-p</i> -Menthan-2-one <sup>c</sup>                 | 1196 | 1195 | -            | -            | -           | -           | 0.23        | -    | 123. | Cuminaldehyde <sup>f</sup>                            | 1244 | 1246 | -    | -    | -    | -    | -    | 0.09 |
| 110. | <b><i>n</i>-Dodecane<sup>*h</sup></b>                    | 1199 | 1200 | <b>14.54</b> | <b>22.13</b> | <b>8.39</b> | <b>4.77</b> | <b>7.96</b> | 2.75 | 124. | Piperitone <sup>c</sup>                               | 1252 | 1252 | -    | -    | 0.08 | -    | 0.07 | 0.03 |
| 111. | <i>trans</i> -Dihydro-Carvon<br>e <sup>c</sup>           | 1205 | 1207 | -            | -            | -           | -           | 0.30        | -    | 125. | <i>cis</i> -Piperitone<br>epoxide <sup>c</sup>        | 1254 | 1256 | -    | -    | 0.07 | -    | 0.07 | -    |
| 112. | <i>n</i> -Decanal <sup>h</sup>                           | 1206 | 1204 | -            | -            | 0.27        | 0.37        | -           | 0.08 | 126. | ( <i>Z</i> )-4-Decen-1-ol <sup>h</sup>                | 1259 | 1257 | -    | -    | 0.06 | -    | 0.07 | -    |
| 113. | <i>trans</i> -Piperitol <sup>c</sup>                     | 1209 | 1212 | -            | -            | 0.12        | -           | 0.12        | -    | 127. | ( <i>E</i> )-2-Decenal <sup>h</sup>                   | 1264 | 1264 | -    | -    | 0.13 | -    | 0.15 | 0.16 |
| 114. | Linalool formate <sup>c</sup>                            | 1211 | 1219 | -            | -            | -           | -           | -           | 0.33 | 128. | <i>n</i> -Decanol <sup>h</sup>                        | 1273 | 1275 | -    | -    | 0.04 | -    | 0.04 | -    |
| 115. | $\beta$ -Cyclocitral <sup>*c</sup>                       | 1219 | 1224 | -            | -            | 0.06        | -           | 0.06        | -    | 129. | Dihydro-Linalool                                      | 1281 | 1287 | -    | -    | -    | -    | -    | 0.11 |

|      |                                                              |      |      |      |      |      |      |      |      | acetate <sup>c</sup> |                                                                              |      |      |   |   |      |   |      |      |
|------|--------------------------------------------------------------|------|------|------|------|------|------|------|------|----------------------|------------------------------------------------------------------------------|------|------|---|---|------|---|------|------|
| 130. | 2-Ethyl-exo-Fenchol <sup>c</sup>                             | 1297 | 1297 | -    | -    | -    | -    | -    | 0.07 | 143.                 | Linalool                                                                     | 1423 | 1423 | - | - | 0.10 | - | -    | -    |
| 131. | <i>n</i> -Tridecane <sup>*h</sup>                            | 1301 | 1300 | 0.23 | 0.67 | 0.16 | 0.22 | 0.16 | 0.06 | 144.                 | butanoate <sup>c</sup><br>4,8- $\beta$ -epoxy-Cary<br>ophyllane <sup>e</sup> | 1424 | 1434 | - | - | -    | - | 0.10 | -    |
| 132. | Undecanal <sup>h</sup>                                       | 1310 | 1310 | -    | -    | -    | -    | -    | 0.10 | 145.                 | ( <i>E</i> )- $\alpha$ -Ionone <sup>*g</sup>                                 | 1427 | 1427 | - | - | 0.16 | - | 0.13 | 0.48 |
| 133. | <i>cis</i> -Dihydro- $\alpha$ -Terpinyl acetate <sup>c</sup> | 1322 | 1317 | -    | -    | -    | -    | -    | 0.81 | 146.                 | $\beta$ -Copaene <sup>*d</sup>                                               | 1436 | 1439 | - | - | -    | - | -    | 0.07 |
| 134. | Citronellyl acetate <sup>*c</sup>                            | 1355 | 1356 | -    | -    | -    | 0.16 | -    | 1.34 | 147.                 | $\gamma$ -Elemene <sup>d</sup>                                               | 1439 | 1441 | - | - | -    | - | -    | 0.25 |
| 135. | Hydroxyl Citronellol <sup>c</sup>                            | 1363 | 1362 | -    | -    | 0.04 | -    | 0.04 | 0.05 | 148.                 | $\alpha$ -Himachalene <sup>d</sup>                                           | 1447 | 1449 | - | - | -    | - | -    | 0.27 |
| 136. | Neryl acetate <sup>c</sup>                                   | 1366 | 1365 | -    | -    | -    | 0.12 | -    | 0.79 | 149.                 | Citronellyl<br>propanoate <sup>a</sup>                                       | 1448 | 1444 | - | - | -    | - | 0.08 | -    |
| 137. | Linalool isobutanoate <sup>c</sup>                           | 1375 | 1375 | -    | -    | 0.05 | -    | 0.05 | -    | 150.                 | $\alpha$ -epi-Cedrane <sup>d</sup>                                           | 1452 | 1449 | - | - | -    | - | 0.04 | 0.13 |
| 138. | $\beta$ -Patchoulene <sup>d</sup>                            | 1381 | 1381 | -    | -    | -    | -    | -    | 0.10 | 151.                 | Sesquisabinene <sup>d</sup>                                                  | 1456 | 1461 | - | - | -    | - | -    | 0.06 |
| 139. | 7-epi-Sesquithujene <sup>d</sup>                             | 1385 | 1391 | -    | -    | -    | -    | -    | 0.11 | 152.                 | Cabreuva oxide<br>B <sup>e</sup>                                             | 1462 | 1466 | - | - | 0.18 | - | -    | 0.12 |
| 140. | $\alpha$ -Chamipinene <sup>d</sup>                           | 1396 | 1396 | -    | -    | 0.12 | -    | -    | 0.13 | 153.                 | <i>cis</i> -Cadina-1(6),<br>4-diene <sup>d</sup>                             | 1463 | 1463 | - | - | -    | - | 0.18 | -    |
| 141. | Cyperene <sup>d</sup>                                        | 1398 | 1398 | 1.7  | -    | 0.60 | 0.39 | 0.59 | 0.21 | 154.                 | 9- <i>epi</i> -( <i>E</i> )-Caryophyllene <sup>d</sup>                       | 1467 | 1465 | - | - | 0.03 | - | -    | -    |
| 142. | $\alpha$ -Thujaplicin <sup>c</sup>                           | 1408 | 1400 | -    | -    | 0.10 | -    | 0.10 | -    | 155.                 | <i>cis</i> -Thujopsadiene <sup>d</sup>                                       | 1470 | 1468 | - | - | 0.05 | - | 0.05 | 0.08 |
| 156. | Amorpha-4,7(11)-diene <sup>d</sup>                           | 1482 | 1484 | -    | -    | -    | -    | -    | 0.07 | 169.                 | Longipinanol <sup>e</sup>                                                    | 1567 | 1567 | - | - | 0.05 | - | -    | -    |
| 157. | Germacrene D <sup>*d</sup>                                   | 1485 | 1487 | -    | -    | -    | -    | -    | 0.45 | 170.                 | Spathulenol <sup>e</sup>                                                     | 1578 | 1585 | - | - | 0.05 | - | -    | 0.09 |
| 158. | <i>trans</i> -Muurolo-4(14),5-                               | 1490 | 1494 | -    | -    | -    | -    | -    | 0.46 | 171.                 | $\alpha$ -Cadinene <sup>d</sup>                                              | 1545 | 1535 | - | - | -    | - | -    | 0.40 |

| diene <sup>d</sup> |                                                  |      |      |      |      |      |      |      |      |      |                                                    |      |      |      |      |      |      |      |      |
|--------------------|--------------------------------------------------|------|------|------|------|------|------|------|------|------|----------------------------------------------------|------|------|------|------|------|------|------|------|
| 159.               | <i>n</i> -Pentadecane* <sup>h</sup>              | 1500 | 1500 | 1.15 | -    | 0.67 | 0.65 | 0.61 | 0.21 | 172. | Selina-3,7(11)-diene <sup>d</sup>                  | 1551 | 1547 | -    | -    | -    | -    | -    | 0.22 |
| 160.               | <i>trans</i> - $\beta$ -Guaiene <sup>d</sup>     | 1505 | 1503 | -    | -    | -    | -    | -    | 0.35 | 173. | $\alpha$ -Cedrene epoxide <sup>e</sup>             | 1568 | 1575 | -    | -    | -    | -    | -    | 0.74 |
| 161.               | $\delta$ -Amorphene <sup>d</sup>                 | 1508 | 1511 | -    | -    | -    | -    | -    | 0.28 | 174. | $\alpha$ -Calacorene <sup>d</sup>                  | 1552 | 1549 | -    | -    | 0.12 | -    | -    | -    |
| 162.               | Nootkatene <sup>d</sup>                          | 1516 | 1518 | -    | -    | -    | -    | -    | 0.05 | 175. | <i>trans</i> -Dauca-4(11),7-diene <sup>d</sup>     | 1558 | 1557 | -    | -    | -    | -    | -    | 0.47 |
| 163.               | $\delta$ -Cadinene* <sup>d</sup>                 | 1523 | 1523 | -    | -    | -    | -    | -    | 0.28 | 176. | Germacrene B <sup>d</sup>                          | 1563 | 1561 | -    | -    | -    | -    | -    | 0.09 |
| 164.               | $\gamma$ -Cuprenene <sup>d</sup>                 | 1532 | 1533 | -    | -    | -    | -    | -    | 0.91 | 177. | $\beta$ -( <i>E</i> )-Ionol acetate <sup>s</sup>   | 1541 | 1535 | -    | -    | -    | -    | -    | 0.04 |
| 165.               | $\gamma$ -Dehydro-ar-Himachalene <sup>d</sup>    | 1537 | 1527 | -    | -    | 0.04 | -    | -    | -    | 178. | 10- <i>epi</i> -Cubebol <sup>e</sup>               | 1535 | 1534 | -    | -    | -    | -    | -    | 0.05 |
| 166.               | <i>cis</i> -Sesqui-Sabinene hydrate <sup>e</sup> | 1546 | 1559 | -    | -    | 0.07 | -    | -    | -    | 179. | $\beta$ -Copaen-4-ol <sup>e</sup>                  | 1587 | 1585 | -    | -    | -    | 0.21 | -    | -    |
| 167.               | $\alpha$ -Agarofuran <sup>e</sup>                | 1553 | 1552 | -    | -    | -    | -    | 0.04 | -    | 180. | Carotol <sup>e</sup>                               | 1594 | 1594 | -    | -    | 2.35 | 0.23 | 0.04 | -    |
|                    |                                                  |      |      |      |      |      |      |      |      | 181. | Globulol <sup>e</sup>                              | 1595 | 1588 | -    | -    | -    | -    | -    | 0.84 |
| 168.               | 2-Methyl-Pentadecan <sup>d</sup>                 | 1562 | 1564 | -    | -    | 0.12 | -    | 0.05 | -    | 182. | <i>n</i> -Hexadecane* <sup>h</sup>                 | 1597 | 1600 | 0.95 | -    | 0.46 | 0.49 | 0.52 | 0.16 |
| 183.               | Guaiol <sup>e</sup>                              | 1606 | 1602 | -    | -    | -    | -    | -    | 0.37 | 197. | $\alpha$ -Cadinol* <sup>e</sup>                    | 1654 | 1658 | -    | -    | -    | -    | -    | 0.49 |
| 184.               | $\alpha$ -Eudesmol* <sup>e</sup>                 | 1619 | 1620 | -    | -    | -    | -    | -    | 0.03 | 198. | $\gamma$ -Muurolene <sup>e</sup>                   | 1658 | 1488 | -    | -    | -    | -    | -    | 0.48 |
| 185.               | 2-(7- <i>Z</i> )-Bisaboladien-4-ol <sup>e</sup>  | 1621 | 1619 | -    | -    | 0.16 | -    | -    | -    | 199. | Junicedranone <sup>e</sup>                         | 1665 | 1665 | -    | -    | -    | -    | -    | 2.03 |
| 186.               | 1- <i>epi</i> -Cubenol* <sup>e</sup>             | 1625 | 1627 | -    | -    | 0.05 | -    | -    | -    | 200. | 7- <i>epi</i> - $\alpha$ -Eudesmol <sup>e</sup>    | 1666 | 1658 | -    | -    | 0.86 | 0.64 | -    | -    |
| 187.               | <i>trans</i> -Isolongifolanone <sup>e</sup>      | 1629 | 1627 | -    | -    | -    | -    | -    | 0.50 | 201. | <i>n</i> -Tetradecanol <sup>h</sup>                | 1678 | 1676 | -    | -    | -    | 1.91 | 0.63 | -    |
| 188.               | $\gamma$ -Eudesmol* <sup>e</sup>                 | 1632 | 1633 | -    | 0.64 | -    | -    | -    | 0.79 | 202. | 14-Hydroxy-( <i>Z</i> )-Caryophyllene <sup>e</sup> | 1667 | 1667 | -    | 0.81 | -    | -    | -    | 2.12 |
| 189.               | <i>allo</i> -Aromadendrene                       | 1637 | 1646 | -    | 2.51 | -    | -    | -    | -    | 203. | Elemol acetate <sup>e</sup>                        | 1680 | 1679 | -    | -    | -    | -    | 0.56 | 0.57 |

|      |                                                     |      |      |   |      |      |      |      |      |      |                                                          |      |      |      |   |      |       |      |      |
|------|-----------------------------------------------------|------|------|---|------|------|------|------|------|------|----------------------------------------------------------|------|------|------|---|------|-------|------|------|
|      | epoxide <sup>e</sup>                                |      |      |   |      |      |      |      |      |      |                                                          |      |      |      |   |      |       |      |      |
| 190. | <i>cis</i> -Cadina-4-en-7-ol <sup>e</sup>           | 1639 | 1636 | - | -    | 0.09 | -    | -    | 0.11 | 204. | <i>α</i> -Bisabolol <sup>e</sup>                         | 1681 | 1683 | -    | - | -    | 3.30  | -    | -    |
| 191. | 1,7- <i>diepi</i> - <i>α</i> -Cedrenal <sup>e</sup> | 1643 | 1643 | - | -    | 0.08 | 0.52 | 0.08 | -    | 205. | Eudesma-4(15),7-dien-1-ol <sup>e</sup>                   | 1683 | 1688 | -    | - | 0.16 | -     | -    | 0.05 |
| 192. | Hinesol <sup>e</sup>                                | 1644 | 1640 | - | -    | -    | -    | -    | 1.30 | 206. | <i>epi</i> - <i>α</i> -Bisabolol <sup>e</sup>            | 1684 | 1686 | -    | - | -    | -     | -    | 0.09 |
| 193. | 2,6,10-Trimethyl-Pentadecane <sup>h</sup>           | 1647 | 1649 | - | -    | -    | -    | 0.05 | -    | 207. | 5- <i>neo</i> -Cedranol <sup>e</sup>                     | 1685 | 1686 | -    | - | -    | 0.42  | -    | -    |
| 194. | ( <i>Z</i> )-Amyl cinnamaldehyde <sup>f</sup>       | 1649 | 1649 | - | -    | 0.23 | -    | -    | -    | 208. | 2,3-Dihydro-Farnesol <sup>e</sup>                        | 1689 | 1689 | -    | - | -    | 0.60  | 0.09 | -    |
| 195. | Valerianol <sup>e</sup>                             | 1652 | 1655 | - | -    | -    | -    | -    | 0.45 | 209. | <i>n</i> -Heptadecane <sup>*h</sup>                      | 1700 | 1700 | 0.99 | - | 0.47 | 16.70 | 4.88 | 0.33 |
| 196. | Himachalol <sup>*e</sup>                            | 1653 | 1656 | - | -    | 0.09 | -    | -    | -    | 210. | Sesquicineol-2-n <sup>e</sup>                            | 1705 | 1702 | -    | - | 0.17 | -     | -    | 0.07 |
| 211. | <i>cis</i> -Thujopsenal <sup>e</sup>                | 1710 | 1709 | - | -    | 0.09 | -    | -    | -    | 226. | Cyclo-Pentadecanolide <sup>h</sup>                       | 1846 | 1806 | -    | - | 0.11 | -     | -    | 0.05 |
| 212. | Mayurone <sup>e</sup>                               | 1711 | 1710 | - | -    | -    | -    | -    | 0.43 | 227. | <i>n</i> -Hexadecanol <sup>h</sup>                       | 1875 | 1881 | -    | - | 0.17 | 12.06 | 5.44 | -    |
| 213. | ( <i>Z</i> )- <i>α</i> -Alantone <sup>e</sup>       | 1716 | 1718 | - | -    | -    | -    | 0.02 | -    | 228. | (5 <i>Z</i> , 9 <i>E</i> )-Farnesyl acetone <sup>g</sup> | 1880 | 1880 | -    | - | -    | 0.50  | 0.15 | -    |
| 214. | <i>iso</i> -Longifolol <sup>e</sup>                 | 1724 | 1723 | - | -    | -    | 0.43 | 0.12 | -    | 229. | <i>n</i> -Nonadecane <sup>*h</sup>                       | 1900 | 1900 | 0.91 | - | 0.29 | 11.55 | 5.78 | 0.22 |
| 215. | 14-Hydroxy-4,5-dihydro-Caryophyllene <sup>e</sup>   | 1706 | 1706 | - | 0.76 | -    | -    | 0.44 | -    | 230. | (5 <i>E</i> , 9 <i>E</i> )-Farnesyl acetone <sup>g</sup> | 1904 | 1913 | -    | - | -    | 0.61  | 0.18 | -    |
| 216. | Curcumenol <sup>e</sup>                             | 1730 | 1734 | - | 2.43 | -    | -    | -    | 0.12 | 231. | Hexadecanoic acidmethyl ester <sup>a</sup>               | 1920 | 1916 | -    | - | -    | 2.04  | 0.76 | 0.09 |
| 217. | Isobicyclo-Germacrene <sup>l</sup> <sup>e</sup>     | 1732 | 1741 | - | 2.30 | 0.08 | -    | -    | -    | 232. | Nootkatin <sup>h</sup>                                   | 1958 | 1961 | -    | - | -    | 0.23  | 0.18 | -    |
| 218. | Cyclo-Colorenone <sup>e</sup>                       | 1749 | 1748 | - | 0.67 | -    | -    | -    | -    | 233. | <i>n</i> -Eicosane <sup>*h</sup>                         | 1995 | 2000 | 0.67 | - | 0.24 | 0.64  | 0.62 | 0.14 |
| 219. | (2 <i>Z</i> , 6 <i>E</i> )-Farnesol <sup>*e</sup>   | 1728 | 1700 | - | -    | -    | -    | -    | 0.10 | 234. | (6 <i>Z</i> ,10 <i>E</i> )-Pseudo-Phytol <sup>h</sup>    | 2022 | 2031 | -    | - | -    | -     | -    | 0.08 |
| 220. | <i>γ</i> -( <i>Z</i> )-Curcumen-12-ol <sup>e</sup>  | 1729 | 1729 | - | -    | 0.23 | -    | -    | -    | 235. | <i>n</i> -Octadecanol <sup>h</sup>                       | 2075 | 2080 | -    | - | -    | 0.35  | 0.26 | -    |



|                             |                                                          |      |      |              |              |              |              |              |              |      |                                             |      |      |      |             |      |             |             |      |
|-----------------------------|----------------------------------------------------------|------|------|--------------|--------------|--------------|--------------|--------------|--------------|------|---------------------------------------------|------|------|------|-------------|------|-------------|-------------|------|
| 221.                        | <i>n</i> -Pentadecanol <sup>h</sup>                      | 1774 | 1778 | -            | -            | -            | 0.14         | 0.07         | -            | 236. | Dehydro-Juvibie <sup>h</sup>                | 2080 | 2085 | -    | -           | -    | -           | 0.04        | -    |
| 222.                        | Benzyl benzoate <sup>f</sup>                             | 1775 | 1775 | -            | -            | 0.08         | -            | -            | -            |      |                                             |      |      |      |             |      |             |             |      |
| 223.                        | ( <i>Z</i> )- $\alpha$ -Santalol acetate <sup>e</sup>    | 1779 | 1669 | -            | -            | 0.32         | -            | -            | -            | 237. | <b><i>n</i>-Heneicosane</b> <sup>*h</sup>   | 2101 | 2100 | 0.91 | -           | 0.33 | <b>8.00</b> | <b>5.18</b> | 1.04 |
| 224.                        | 14-Hydroxy- $\alpha$ -Muurolo<br>ene <sup>e</sup>        | 1782 | 1782 | -            | -            | 0.21         | -            | -            | 0.14         | 238. | Linolenic acid<br>methyl ester <sup>a</sup> | 2109 | 2108 | -    | -           | 0.49 | 0.30        | 0.08        | 0.34 |
| 225.                        | <i>n</i> -Octadecane <sup>*h</sup>                       | 1796 | 1800 | 0.96         | -            | 0.31         | 0.28         | 0.40         | 0.11         | 239. | <b>Laurenan-2-one</b> <sup>h</sup>          | 2120 | 2116 | 0.71 | <b>3.40</b> | 0.37 | -           | -           | 0.08 |
| 240.                        | <i>n</i> -Docosane <sup>*h</sup>                         | 2203 | 2200 | 0.95         | -            | 0.23         | 0.36         | 0.42         | 0.27         | 248. | <i>n</i> -Pentacosane <sup>*h</sup>         | 2500 | 2500 | 1.80 | -           | 0.54 | 1.56        | 2.70        | 2.11 |
| 241.                        | ( <i>E</i> )-Phytol acetate <sup>a</sup>                 | 2232 | 2218 | -            | -            | -            | -            | -            | 0.10         | 249. | Hexacosane <sup>*h</sup>                    | 2601 | 2600 | 0.55 | -           | 0.34 | -           | 0.13        | 0.19 |
| 242.                        | ( <i>Z</i> )-9-Tricosene <sup>*h</sup>                   | 2294 | 2271 | -            | -            | -            | -            | -            | 0.13         | 250. | Heptacosane <sup>*h</sup>                   | 2700 | 2700 | 2.02 | -           | 0.51 | 0.42        | 0.85        | 2.35 |
| 243.                        | <b><i>n</i>-Tricosane</b> <sup>*h</sup>                  | 2301 | 2300 | 1.98         | -            | 0.28         | 2.71         | <b>3.45</b>  | 2.40         | 251. | Octacosane <sup>h</sup>                     | 2794 | 2800 | -    | -           | 0.11 | -           | 0.03        | 0.03 |
| 244.                        | 3- $\alpha$ -14,15-Dihydro-Ma<br>nool oxide <sup>h</sup> | 2331 | 2338 | -            | -            | -            | -            | -            | 0.04         | 252. | Nonacosane <sup>*h</sup>                    | 2885 | 2900 | 1.99 | -           | 0.38 | -           | 0.11        | 0.16 |
| 245.                        | <i>n</i> -Tetracosane <sup>*h</sup>                      | 2395 | 2400 | 1.07         | -            | 0.36         | 0.25         | 0.41         | 0.24         | 253. | Triacontane <sup>*h</sup>                   | 3059 | 3000 | 1.02 | 0.25        | 0.42 | -           | -           | -    |
| 246.                        | ( <i>E</i> )-Labd-13-en-8,15-di<br>ol <sup>h</sup>       | 2431 | 2422 | -            | -            | -            | -            | -            | 0.16         |      |                                             |      |      |      |             |      |             |             |      |
| 247.                        | Drimenol <sup>h</sup>                                    | 2494 | 1750 | -            | -            | -            | -            | -            | 0.11         |      |                                             |      |      |      |             |      |             |             |      |
| <b>Total identified (%)</b> |                                                          |      |      | <b>89.61</b> | <b>94.83</b> | <b>85.76</b> | <b>93.55</b> | <b>92.54</b> | <b>94.66</b> |      |                                             |      |      |      |             |      |             |             |      |

RBW (*Rosa banksiae* var. *banksiae*), RPO (*Rosa polyantha* orange fairy), RPW (*Rosa polyantha* white fairy), A (Aerial parts) and F (Flowers). (\*) is for components reported before for different *Rosa* species volatile oil; bolded numbers for components with concentrations  $\geq 3\%$

a: fatty acid-derived volatiles, b: monoterpene hydrocarbons, c: oxygenated monoterpenes, d: sesquiterpene hydrocarbons, e: oxygenated sesquiterpenes, f: phenylpropanoids/aromatics, g: carotenoid-derived volatiles, h: miscellaneous.

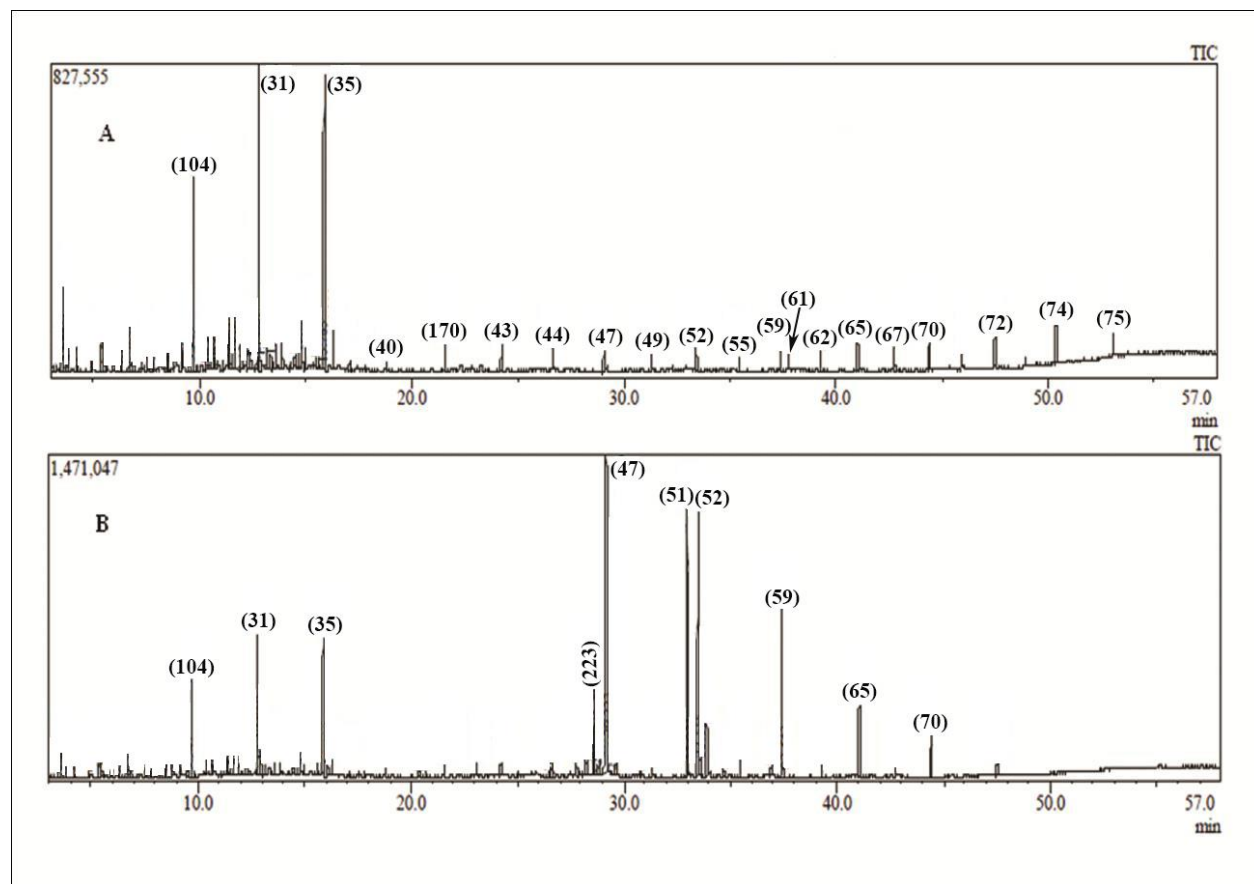

**Figure S1.** GC-chromatogram of the essential oil of *Rosa banksiae* var. *banksiae* Ait. (A) Aerial parts (RBW-A), (B) Flowers (RBW-F).

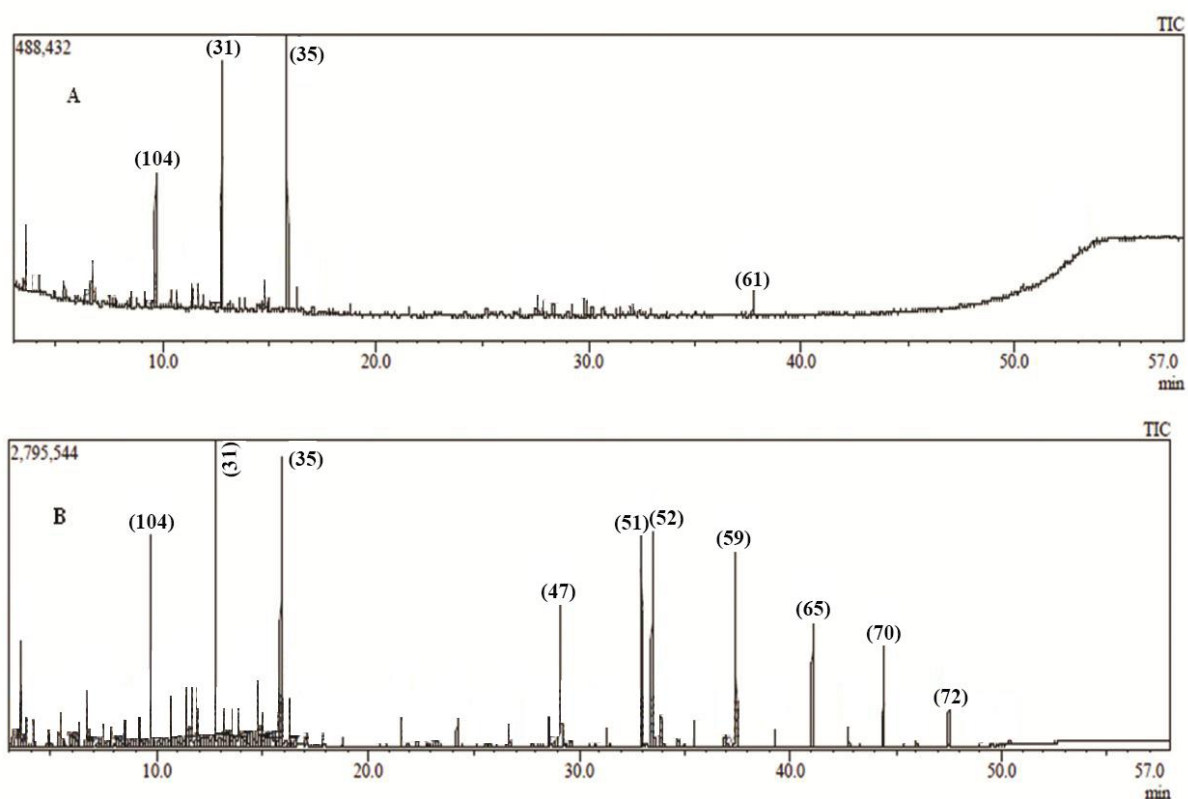

**Figure S2.** GC-chromatogram of the essential oil of *Rosa polyantha* Thunb. orange fairy (A) Aerial parts (RPO-A), (B) Flowers (RPO-F).

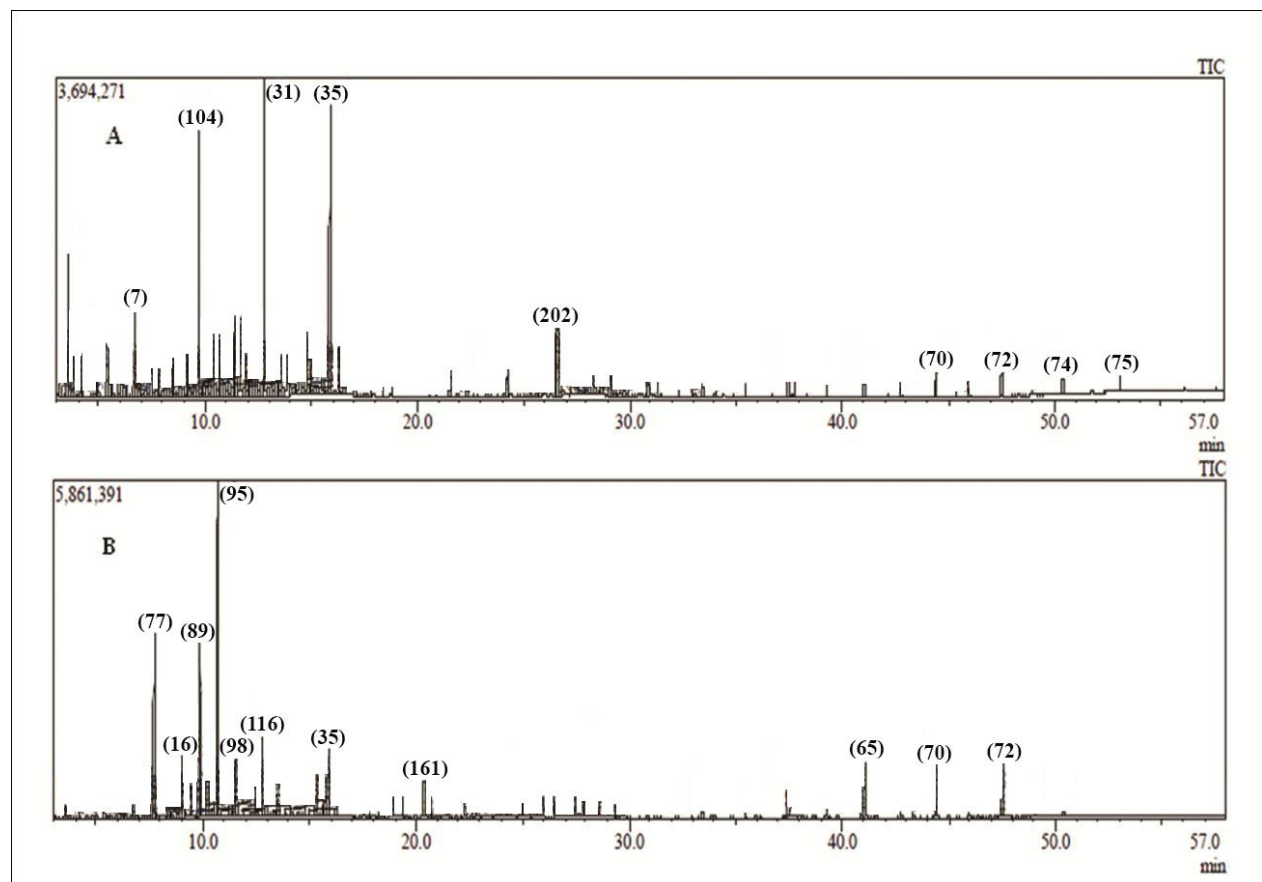

**Figure S3.** GC-chromatogram of the essential oil of *Rosa polyantha* Thunb. white fairy (A) Aerial parts (RPW-A), (B) Flowers (RPW-F).
